# Supplementary material for: Yak IGF2 Promotes Fibroblast Proliferation Via Suppression of IGF1R and PI3KCG Expression
Source: PubMed Central journal article supplement (PMC5867890; doi:10.3390/genes9030169), 2018-03-20
Supplement: genes-09-00169-s001.pdf [file genes-09-00169-s001.pdf]

## Supplementary Table S1

**Table S1 Primers information of PCR and qPCR**

| Primer name    | Primer sequence                                                           | Products | Genebank No.   |
|----------------|---------------------------------------------------------------------------|----------|----------------|
| AKT1-F         | GGGAAGGTGATCCTGGTGAA                                                      | 115      | XM_005911925.2 |
| AKT1-R         | GGTTCTCTGTGAGCGTGTGG                                                      |          |                |
| IGF1-F         | CATCACATCCTCCTCGCATC                                                      | 146      | KJ489376       |
| IGF1-R         | TGAAATAAAAGCCCCTGTCTCC                                                    |          |                |
| IGF1R-F        | CCAGAGCAAAGGGGACATAAA                                                     | 87       | KF303539.1     |
| IGF1R-R        | GTGGTGGTGGAGGTGAAGTG                                                      |          |                |
| IGF2-F         | CTGGTGCTTCTTGCCTTCTTG                                                     | 259      | KF682139.1     |
| IGF2-R         | CAGACACATCCCTCTCGGACTT                                                    |          |                |
| IGF2R-F        | GCACGGCAACCTGTATAACCT                                                     | 235      | XM_014479665.1 |
| IGF2R-R        | CATCTTCAGCACCCCATTCTC                                                     |          |                |
| IRS1-F         | TGGATGCAGGTGGACGA                                                         | 175      | XM_005890133.2 |
| IRS1-R         | TGGGTGGAGGGTTGTTGAG                                                       |          |                |
| PIK3CG-F       | TCAATGTCCATCTCCATTCTCCT                                                   | 138      | XM_005901435.2 |
| PIK3CG-R       | GATTGCCTCCAGTTGCTTCC                                                      |          |                |
| GAPDH-F        | CAACGGCACAGTCAAGGCA                                                       | 232      | EU195062.1     |
| GAPDH-R        | CATCACAAACATGGGGGCA                                                       |          |                |
| Yak IGF2       | <u>CGAGCTCGCC</u> ACCATGGGGATCACAGCAGGAAA<br>CGGGATCCCTAATCGCTGGATGCCTTGG | 540      | KF682139.1     |
| siRNA-yak IGF2 | UCCAAGGCAUCCAGCGAUUdTdT<br>dTdTTCAGGUUCCGUAGGUCGCUAA                      |          | KF682139.1     |
